# Supplementary material for: What Truly Matters for The Implementation of Medical Alliances? A Cross-Sectional Study in China From The Perspective of Physicians
Source: Research Square preprint supplement (doi:10.21203/rs.3.rs-723663/v1), 2021-07-20
Supplement: Supplementary file 1 [file 8980aeff119a0b5517220c4f.docx]

No：___________________

**Questionnaire for Medical Alliance Physicians**

Dear Sir/Madam,

Hello! We are currently conducting a questionnaire survey on the construction of medical alliance in Beijing, with the purpose of understanding your cognition and satisfaction with medical alliances (MAs), and providing a scientific reference for the further improvement of MAs in Beijing. This questionnaire is filled in anonymously, and the survey results are only used for research, not for other purposes. You only need to fill in the questionnaire according to your actual situation, which is very important for our research!

Thank you for your support and cooperation!

Beijing Municipal Commission

Oct.2016

_____________________________________________________________________

Please tick "○" or "√" if appropriate.

1. The name of your hospital____________ clinical department________________
2. What’s your sex?__________ A male B female
3. When were you born ____________year
4. What’s your education level? ____________

A. less than junior college B. bachelor's degree

C. master degree D. doctor degree

1. What’s your positional title? ____________

A junior B. intermediate C. deputy senior D. senior

1. How many years have you been working? _________
2. Are you rehired after retirement? ____________ A. yes B. no
3. How much do you know about the policies of the MA policy? ____________
4. excellent B. above average C. average D. below average E. poor
5. What is your approach to understanding the MA policy? ____________

A. media reports B. community propaganda C. hospital propaganda

D. family and friends propaganda E. others ____________

10. Is your department collaborate with other hospitals to implement MA (such as inviting expert of cooperator consultations, rounds, lectures, etc.)? ____________

A. completely absent B. occasionally there are some C. neutral

D. relatively more E. very much

1. In what way do you think that sending high-level hospital doctors to the community can meet the needs of the residents for common disease? ____________

A. doctors in superior professional departments B. according to their needs

C. physicians who can treat four major chronic diseases D. others__________

1. What is your evaluation of the effectiveness of the MA to improve community residents' satisfaction? ____________

A. not good B. not very good C. no change D. good E. very good

1. What is your evaluation of the effectiveness of the MA in improving the primary diagnosis at grassroot level and two-way referral? ____________

A. not good B. not very good C. no change D. good E. very good

1. What is your evaluation of the effectiveness of informatization in MA (such as registration systems, telemedicine, etc.)? ____________

A. not good B. not very good C. no change D. good E. very good

1. What is your evaluation of the mutual recognition of the results within MA?

____________

A. not good B. not very good C. no change D. good E. very good

1. After the implementation of the MA, what is your evaluation of your overall workload? ____________

A. a lot of work, often need to work overtime

B. acceptable workload, basically able to work on time C. less work

1. what is your evaluation of the pressure on the work of the MA? ____________

A. relaxed B. can deal with it normally C. overload

1. Do you think it is necessary to go to other medical institutions for outpatient or ward round in the MA? ____________

A. unnecessary B. relatively unnecessary C. neutral

D. relatively necessary E. necessary

1. How do you evaluate the effectiveness of out-patient or ward rounds made by doctors from large hospitals to other medical institutions in MA? ____________

A. poor B. relatively poor C. neutral D. relatively good E. good

1. Do you think it is necessary to train other medical institutions within the MA? ____________

A. unnecessary B. relatively unnecessary C. neutral

D. relatively necessary E. necessary

1. In the past year, how many times have you trained within the MA? ____________

A. 10 or over B. 7-9 C. 4-6 D. 1-3 E.0

1. How do you evaluate the effectiveness of doctors training within the MA? ____________

A. poor B. relatively poor C. neutral D. relatively good E. good

1. After the implementation of the MA, what effect has MA had on your professional and technical capabilities? ____________

A. nothing improved B. insignificant improved C. neutral

D. improved E. significantly improved

1. After the implementation of the MA, what effect has MA had on your income and benefit? ____________

A. nothing improved B. insignificant improved C. neutral

D. improved E. significantly improved

1. What is your evaluation of job satisfaction after the implementation of the MA? ____________

A. extremely unsatisfied B. relatively unsatisfied C. neutral

D. relatively satisfied E. extremely satisfied

1. In your opinion, what adverse effects will the MA bring to you? ____________

A. increased workload B. influencing academic development

C. wasting time D. reduced income E. no effects F. others ________

1. What do you think are the main problems in the construction of MA? _________

A. government's financial support

B. medical insurance issues

C. drug problems

D. balance of interests among member units of the medical association

E. information sharing

F. inadequate cooperation system among member organizations of medical associations

G. Others __________

1. What are your opinions and suggestions on the current establishment of the MA?

_________________________________________________________________________________________________________________________________________________________________________________________________________________________________________________________________________________________________________________________________________________________

_____________________________________________________________________

_____________________________________________________________________
